1 **CELL ELIMINATION STRATEGIES UPON IDENTITY SWITCH VIA MODULATION OF *APTEROUS***  
2 **IN *DROSOPHILA* WING DISC**

3

4

5 Olga Klipa<sup>1,2</sup> and Fisun Hamaratoglu<sup>1,2\*</sup>

6

7 <sup>1</sup>School of Biosciences, Cardiff University, Cardiff, CF10 3AX, United Kingdom

8 <sup>2</sup>Center for Integrative Genomics, University of Lausanne, 1015, Lausanne, Switzerland \*

9 (\*- previous address)

10

11

12 \* To whom correspondence should be addressed: hamaratoglu@cardiff.ac.uk

13

14 **ABSTRACT**

15

16 The ability to establish spatial organization is an essential feature of any developing tissue and  
17 is achieved through well-defined rules of cell-cell communication. Maintenance of this  
18 organization requires elimination of cells with inappropriate positional identity, a poorly  
19 understood phenomenon. Here we studied mechanisms regulating cell elimination in the  
20 context of a growing tissue, the *Drosophila* wing disc and its dorsal determinant Apterous.  
21 Systematic analysis of *apterous* mutant clones along with their twin spots shows that they are  
22 eliminated from the dorsal compartment via three different mechanisms: sorting to the  
23 ventral compartment, basal extrusion, and death, depending on the position of the clone in  
24 the wing disc. We find that basal extrusion is the main elimination mechanism in the hinge,  
25 whereas apoptosis dominates in the pouch and in the notum. In the absence of apoptosis,  
26 extrusion takes over to ensure clearance in all regions. Notably, clones in the hinge grow larger  
27 than those in the pouch, emphasizing spatial differences. Mechanistically, we find that limiting  
28 cell division within the clones does not prevent their extrusion. Indeed, even clones of one or  
29 two cells can be extruded basally, demonstrating that the clone size is not the main  
30 determinant of the elimination mechanism to be used. Overall, we revealed three elimination  
31 mechanisms and their spatial biases for preserving pattern in a growing organ.

32

## 33 INTRODUCTION

34

35           Multicellularity requires precise spatial organization of cells during development.  
36 Aberrant cells that arise as a result of sporadic mutations or chromatin defects can challenge  
37 the robustness of a developmental program. For example, the cells that acquire incorrect  
38 positional identity disrupt the proper spatial organization. Those cells are potentially  
39 dangerous and cannot be tolerated. Therefore, mechanisms that ensure elimination of such  
40 cells are in place, yet they remain poorly understood. Arguably, one of the best-characterized  
41 systems to study the spatial organization of a developing tissue is the *Drosophila* wing imaginal  
42 disc. This organ is amenable to mosaic technique, which is particularly useful for studying  
43 interactions of differently specified cells *in vivo*. The pattern in the wing disc is set by restricted  
44 expressions of fate determinants that are turned on in a sequential manner. Engrailed and  
45 Apterous (Ap) define posterior and dorsal fates, respectively, and lead to the formation of  
46 compartment boundaries that provide lineage restriction (1-3). Further subdivisions are  
47 achieved by restricted expressions of Vestigial in the pouch, Homothorax and Teashirt in the  
48 hinge and the Iroquois complex in the notum (4-8). The cell clones with altered expression of  
49 such genes disrupt the tissue pattern and trigger a set of common events. Such clones round  
50 up to minimize contact with their neighbors. Some of the clones were reported to undergo  
51 apoptosis or bulge out of the tissue forming cysts (9-14).

52           In addition to separating opposing compartments from each other and preventing cell  
53 mixing, the compartment boundaries also act as signaling centers. The morphogens  
54 Decapentaplegic (Dpp) and Wingless (Wg), secreted from these centers, form concentration  
55 gradients and orchestrate proper tissue size and shape (15-19). Disruption of morphogen  
56 gradients also triggers a set of common events that will eventually restore the pattern via

57 elimination of the mis-positioned cells (9, 10, 13, 20-23). Strikingly, in all these cases there is  
58 a strong regional bias. For example, *thickveins* mutant cell clones, that lack the Dpp receptor,  
59 undergo apoptosis or basal extrusion in the medial wing disc where the pathway activity is  
60 high, yet they can be tolerated laterally where the pathway activity is naturally low (21, 24,  
61 25). Therefore, disruption of the pattern in the tissue prompts the mechanisms in place to  
62 restore it.

63 Here, we aimed to understand how cells with altered expression of the dorsal  
64 determinant Ap are eliminated from the tissue. It has been shown that Ap expressing clones  
65 are eliminated from the ventral compartment; whereas clones expressing Ap inhibitor  
66 *Drosophila* LIM only (dLMO) are eliminated from the dorsal one (11). Ap acts as a transcription  
67 factor (26). Via regulation of its target genes glycosyltransferase Fringe and Notch ligand  
68 Serrate in dorsal compartment it mediates activation of Notch and Wg signaling pathways at  
69 the D/V compartment boundary (27-31). Similar signaling was observed around Ap or dLMO  
70 cell clones if they happen to be in the incorrect place (11, 32). Depletion of Notch signaling  
71 within the clones, using *Notch<sup>DN</sup>*, was shown to prevent almost all elimination in the pouch  
72 region (11). The same rescue effect was observed when the apoptosis of clones was prevented  
73 by expression of *p35* (11). This highlights the importance of the ectopic signaling for the  
74 elimination process and defines apoptosis as its main executor.

75 Notably, all these experiments were focused on the clones located in the pouch.  
76 However, whether clones in other regions behave the same remains unknown. Here we take  
77 a quantitative approach to define the contributions of different strategies – apoptosis, basal  
78 extrusion and sorting – employed by the tissue to deal with mis-positioned cell clones.  
79 Importantly, we did not limit our analysis to a specific region, and characterized *ap* clone

80 behavior throughout the tissue. Our approach revealed a striking regional bias of the  
81 contributing mechanisms.

82

## 83 **RESULTS**

84

### 85 **A new *apterous* allele and use of twin-spots allow systematic and quantitative analysis of** 86 **clone elimination**

87

88         Systematic analysis of the behavior of *ap* mutant clones has not been possible until  
89 recently due to technical limitations of classical clonal analysis approaches. This is because the  
90 *ap* locus lies between the centromere and the canonical flippase recognition target (FRT) site  
91 on the right arm of the second chromosome. Hence this FRT site cannot be used to generate  
92 *ap* mutant patches. To circumvent this problem, we used a new *ap* allele generated by Bieli et  
93 al. (33, 34), where a well-positioned FRT (f00878) was used to generate a deletion of the whole  
94 coding region of *ap* (*ap*<sup>DG8</sup>). Using this new tool, we first generated positively marked *ap*  
95 mutant clones as well as clones with ectopic Ap expression. The wild-type control clones were  
96 distributed uniformly throughout the disc (Fig 1A). In contrast, clones altered for Ap function  
97 displayed compartment bias. In agreement with former reports (11, 32), cells that lose *ap*  
98 expression are underrepresented in the dorsal compartment (Fig 1B) and, likewise, cells with  
99 ectopic Ap expression are eliminated from the ventral compartment (Fig 1C). The misspecified  
100 clones that remained in the tissue minimize their contact with surrounding native cells and  
101 display ectopic boundary signaling (detected by Wg) at the clone border, where Ap-expressing  
102 and Ap- non-expressing cells contact each other (Fig 1B, arrows). Thus, cells are cleared from  
103 the region where they do not normally belong, pointing at the existence of intrinsic

104 mechanisms that detect and get rid of misspecified cells and hence contribute to the  
105 maintenance of compartment organization.

106

107 **Fig 1. The recovery of clones altered for Ap function is compartment biased.**

108 (A-B) Third instar wing discs with GFP-marked wild-type (A), *ap<sup>DG8</sup>* (B) and Ap-expressing (C) clones. The arrows  
109 point to ectopic Wg expression around mis-specified clones. Scale bars represent 100µm. Hereinafter disc  
110 orientation is dorsal is up, anterior is to the left.

111

112 In order to have a disc intrinsic measure of how many clones were originally generated  
113 we utilized a classical mitotic recombination approach that allows to generate mutant clones  
114 together with their wild-type twin sisters. To mark mutant clones positively we placed *GFP* on  
115 the chromosome that carried *ap* mutation. Therefore, in our set-up the *ap* homozygous  
116 mutant clones were marked positively by two copies of *GFP*, whereas their sister wild-type  
117 clones (twin spots) - by the absence of *GFP*. To understand what happens to the mutant cells  
118 after their induction, we followed their fate in a time-course experiment using this set-up. We  
119 induced clones shortly before D/V boundary formation, at 46h after egg laying (AEL), and took  
120 time points every 10h (Fig 2A). The dorsal clones of each time-point were categorized into 3  
121 groups (Fig 2B). The first group includes pairs of *ap* mutant and wild-type clones (Fig 2B (a)).  
122 This group reflects the number of mutant clones that remained in the dorsal compartment at  
123 a particular time point. The second group contains wild-type clones without their mutant  
124 sisters (Fig 2B (b)) and corresponds to the number of *ap* mutant clones which had already  
125 been eliminated. The last group includes wild-type clones in the dorsal compartment that  
126 have their mutant twins in the ventral part (Fig 2B (c)), suggesting that those mutant clones  
127 are presumably clones of a dorsal origin that had been sorted to the ventral compartment.

128 The percentages of clone pairs in each group normalized to the number of all dorsally located  
129 wild-type clones are shown (Fig 2G-I, red lines).

130

131 **Fig 2. The dynamics of clone elimination.**

132 (A) Time-course scheme. (B) Strategy of clonal analysis. Example of the disc with *ap* mutant (2 copies of GFP, red  
133 outline) and wild-type sister (absence of GFP, blue outline) clones. (a) – wild-type clone together with the mutant  
134 twin; (b) – wild-type clone without the mutant sister; (c) – wild-type clone with *ap* mutant sister in the opposite  
135 compartment. White line corresponds to the D/V boundary. (C-F) Wing discs of indicated times containing  
136 differently marked wild-type and *ap<sup>DG8</sup>* sister clones. (C'-F') Wg channel of C-F. (G-I) Plots represent amount of  
137 dorsal clones that remained in the dorsal part (G), have been sorted to the ventral part (H) or completely  
138 eliminated from the disc (I) as a function of time. Number of clones in each group was normalized to the number  
139 of dorsally located wild-type clones (per disc). Red lines correspond to the ratios of *ap<sup>DG8</sup>* clones to their wt sisters  
140 (experimental discs); blue lines correspond to the ratios of wt clones to their wt sisters (control discs, shown on  
141 Fig S1). Note, the control discs were analysed only at 70h, 80h and 90h AEL. At least 15 discs were analysed for  
142 each time-point. Data represent mean±CI (95%). Scale bars represent 50µm.

143

144 At 24h AHS (the first time-point), almost 75% of dorsally located wild-type clones had  
145 their mutant twins (Fig 2C, 2G). Interestingly, the clones and their sisters had similar sizes  
146 (about 8-12 cells) at that time point. This indicates that the mutant cells initially were able to  
147 grow in the dorsal compartment. However, 10 hours later (34h AHS) the amount of *ap* clones  
148 recovered in the dorsal part dropped sharply (Fig 2D, 2G). Less than 40% of mutant clones  
149 remained in the dorsal disc. Those clones were much smaller and more circular compared to  
150 their wild-type sisters. In the next 20 hours, the number of dorsally located mutant clones  
151 declined only slightly (Fig 2E-F, 2G). Nearly 30% of mutant clones had remained in the dorsal  
152 disc at 54h AHS (the last time point). Interestingly, the clones at the very proximal notum (disc  
153 tip) and lateral notum regions were not eliminated (Fig 2E, arrowheads).

154           The mutant clones that were removed from the dorsal compartment had been either  
155 sorted to the ventral one (Fig 2H) or eliminated from the disc tissue completely (Fig 2I). We  
156 observed relatively high number (15%) of dorsally located wild-type clones with their mutant  
157 sisters in the ventral compartment at the first time-point (70h AEL) (Fig 2C, 2H). The number  
158 of such clones nearly doubled at the second time-point (80h AEL) (Fig 2D, 2H). The sorted  
159 mutant cell clones accumulated at the D/V boundary from the ventral side (visible in Fig 2D-  
160 F). Clone sorting is coupled to boundary reorganization (Fig 2C', 2E', arrows). We observed  
161 that the ectopic signaling induced between the mutant cells and the surrounding *Ap*-  
162 expressing cells can be incorporated into the regular compartment boundary if a mutant clone  
163 happens to arise in close proximity to the D/V boundary. Importantly, the deformed D/V  
164 boundary straightens after the sorting has been completed, as we nearly never observed  
165 boundary deformations at 100h and later (Fig 2F' and data not shown).

166           The high percentage of sorting events (30% of all *ap* clones induced) raised the  
167 question of how many of these events were by chance, especially because the clones were  
168 induced prior to D/V boundary formation. To estimate the frequency of clones being born and  
169 twins ending in opposite compartments by chance, we analyzed control discs, where both  
170 sister clones were wild-type (Fig S1, 2G-I blue lines). In such control discs, nearly all dorsal  
171 clones (95%) remained in the dorsal compartment together with their twins (Fig 2G). The  
172 sister clones located in different compartments were observed very rarely (below 5%) (Fig  
173 2H). Therefore, we conclude that dorsally originated *ap* mutant clones that are in close  
174 proximity to the D/V boundary are actively sorted into the ventral compartment.

175           Finally, we found that a high number of dorsal mutant clones (42%) were completely  
176 eliminated from the wing discs (Fig 2F, 2I). The majority of the elimination took place early,



177 between the first two time points. Overall, 72% of all dorsal *ap* mutant clones were removed  
178 from the dorsal compartment: 30% *via* sorting and 42% *via* full elimination.

179

### 180 **The later the clone induction, the less efficient is the elimination**

181

182 Next we asked whether the elimination and sorting rates depend on the clone  
183 induction time. To address this question, we induced the *ap* clones later, at 66h AEL (time  
184 after boundary formation), and analyzed at 100h and 110h AEL, which correspond to 34h and  
185 44h after heat-shock (AHS), respectively (Fig 3A). Thus, we can compare the results of this  
186 experiment (late induced clones) with the results of our previous experiment (early induced  
187 clones) at least for 34 and 44h AHS.

188

### 189 **Fig 3. The late induced clones are eliminated less efficiently than the early induced ones.**

190 (A) Time-course scheme where clones are induced at 66h AEL. (B-C) Wing discs of indicated times containing  
191 differently marked *ap<sup>DG8</sup>* and wild-type clones. (B'-C') Wg channel alone. (D-E) Comparison of removal of *ap<sup>DG8</sup>*  
192 clones that were induced at 46h AEL ("early induced", shown in Fig2) with the one of those that were induced  
193 at 66h AEL ("late induced") at 34h (D) and 44h (E) AHS. At least 10 discs with late induced clones were analysed  
194 per time point. (F) Percentages of defective wings due to wild-type, *ap<sup>DG8</sup>* and Ap-expressing flip-out clones  
195 induced at 46h or at 66h AEL. Numbers of analysed wings: early induced: wt - 302; *ap<sup>DG8</sup>* - 304; UAS-Ap - 482;  
196 late induced: wt - 230; *ap<sup>DG8</sup>* - 102; UAS-Ap - 84. Scale bars represent 50µm.

197

198 Expectedly, the clones were more abundant when induced in older discs due to the  
199 higher cell number (compare Fig 3B-C with Fig 2D-E). Using the categorization strategy  
200 described (Fig 2B), we quantified the percentage of mutant clones of dorsal origin that were  
201 either completely eliminated from the disc tissue or sorted to the ventral compartment. We

202 found that the portions of completely eliminated mutant clones as well as sorted ones were  
203 significantly smaller for the late induced clones compared to the early induced ones at both  
204 34h (Fig 3B, 3D) and 44h AHS (Fig 3C, 3E).

205 Remarkably, the induction of *ap* LOF clones after D/V boundary formation resulted in  
206 boundary deformations (Fig 3B', note the wiggly D/V boundary) similar to what we observed  
207 when the clones were induced before the D/V boundary formation (Fig 2E'). Therefore, the  
208 compartment boundary can be rearranged after its formation. Such boundary flexibility  
209 allows the mutant clones to be rescued by displacement to the ventral compartment, though  
210 this happens more rarely for the clones induced after boundary formation than for the ones  
211 induced before. Altogether, the efficiency of misspecified cell elimination depends on the  
212 developmental stage: the mutant clones induced early are eliminated from the dorsal  
213 compartment more efficiently than the late induced ones.

214 Previous studies showed that *ap* mutant clones can lead to deformations in the adult  
215 wings (3). Indeed, in most cases, the presence of cells with inappropriate dorso-ventral  
216 positional identity in adult tissue caused ectopic margin formation (Fig S2B), wing margin  
217 duplications (Fig S2C, S2C'), blister-like outgrowths (Fig S2D, S2E), and, occasionally, wing  
218 duplications (Fig S2F, S2G). Importantly, the occurrence of defective wings highly correlates  
219 with the time of clone induction. When *ap* clones were induced late a vast majority of the  
220 wings (83%) had defects. In contrast, only one out of three wings were defective when the  
221 induction was early (Fig 3F). We observed the same trend with Ap-expressing clones induced  
222 at different times (Fig 3F). Thus, early induced misspecified clones are more likely to be  
223 eliminated, leading to normal wings. This finding highlights the importance of mechanisms in  
224 place to eliminate misspecified cells.

225

## 226 **Three region specific mechanisms ensure the clearance of misspecified cell clones**

227

228 Next, we set out to study how the misspecified cells are being cleared from the tissue.

229 As discussed, for *ap* mutant cells in close proximity of the D/V boundary, an elegant solution  
230 is to cross over to the opposite side (Fig 4A). This strategy also works for the clones  
231 misexpressing Ap (Fig 4B). During this process the ectopic boundary signaling induced  
232 between the misspecified cells and surrounding wild-type cells fuses with the regular D/V  
233 boundary, forming a loop-like structure around the misspecified clone (Fig 4A', 4B'). This  
234 allows dorsal mutant cells or ventral Ap-expressing cells to mix with the cells from the opposite  
235 compartment and eventually recover at the correct place.

236

### 237 **Fig 4. Mechanisms of the elimination display region specificity.**

238 (A-B) Third instar wing discs with *ap<sup>DG8</sup>* (A) or Ap-expressing (B) clones displaying D/V boundary deformation and  
239 clone sorting. (A'-B') Wg channel of A-B. (C-D) TUNEL assay of third instar wing discs with *ap<sup>DG8</sup>* MARCM (C) or  
240 Ap-expressing (D) clones. The pouch regions are shown. Disc orientation: dorsal – up, ventral – down. (C'-D') Wg  
241 and TUNEL channels of C-D. (E-E') Pouch region of the third instar wing disc with *ap<sup>DG8</sup>* clones shown from the  
242 apical (E) and the basal (E') sides. The arrows point to the bulging clone. The XZ and YZ planes throughout the  
243 bulging clone are also shown (XZ orientation: the apical side – up, YZ orientation: the apical side – right). (F-G)  
244 Mechanisms of elimination display region-specificity. (F) Third instar wing disc containing *ap<sup>DG8</sup>* mitotic clones  
245 (marked by 2 copies of GFP) that remained at 50h AHS. White dashed line represents D/V boundary; red dashed  
246 line outlines the pouch region. (F') Zoom-in of the region defined by white square in F. The XZ cross-sections  
247 throughout the clones located in the hinge and the pouch are shown below (orientation: the apical side – up).  
248 (G) Quantification of dorsal mutant clones in different regions depending on the evidence of elimination type:  
249 apoptosis, extrusion or apoptosis together with extrusion. A total of 77 dorsal *ap* mutant clones from 23 discs  
250 were analyzed: 38 clones were in the pouch, 16 in the hinge and 23 in the notum. Scale bars represent 50µm.

251

252 Another mechanism contributing to the elimination of misspecified cells is apoptosis  
253 (11). Indeed, as revealed by TUNEL assay, both *ap* mutant and Ap-expressing clones undergo  
254 apoptosis in the inappropriate compartment (Fig 4C-D'). Interestingly, the apoptotic cells were  
255 detected both within and surrounding the misspecified cell clones (Fig 4C-D').

256 Moreover, some misspecified clones displayed evidence of basal extrusion. The apical  
257 surfaces of those clones were narrower (Fig 4E), than their basal side (Fig 4E'), and the central  
258 cells were much shorter (Fig 4E, XZ and YZ). More lateral cells of the clone will eventually fuse  
259 above the gap forming a cyst-like structure with the apical side enclosed inside, contributing  
260 to the clearance.

261 Importantly, the vast majority of the bulging *ap* mutant clones were in the prospective  
262 hinge or in the very proximal pouch regions of the dorsal compartment. To estimate if there  
263 is any relationship between the region of clone location and the mechanism of elimination we  
264 carefully analyzed all *ap* mutant clones that remained in the dorsal compartment 50h after  
265 clone induction in the third instar wing discs. Moreover, the TUNEL assay allowed us to detect  
266 apoptotic cells. We reasoned that all sorting events at the boundary region had already taken  
267 place by this time. Thus, we focused only on the clones that were trapped in the dorsal  
268 compartment. Mutant clones from 23 wing discs were analyzed. Clones located in different  
269 regions of the dorsal compartment (dorsal pouch, dorsal hinge and the notum) were grouped  
270 based on the type of elimination they displayed: apoptosis (without evidence of extrusion),  
271 extrusion (without apoptosis), extrusion accompanied by apoptosis and the clones that did  
272 not display any evidence of elimination (Fig 4G). In the pouch, almost all misspecified clones  
273 underwent apoptosis (36 clones out of 38 clones examined in the pouch) (Fig 4F-G). Some of  
274 these apoptotic clones also bulged out, especially the ones in the proximal pouch (10 clones  
275 out of 36). We found no examples of extrusion for the clones located closer to the D/V

276 boundary. In contrast, in the hinge, the majority of the mutant clones displayed a cyst-like  
277 phenotype (14 clones out of 16 examined clones in the hinge) (Fig 4F-G). Interestingly, the  
278 bulging clones in the hinge were not necessarily accompanied by apoptosis, but all apoptotic  
279 clones displayed extrusion (Fig 4G). This finding suggests that the induction of clone extrusion  
280 in the hinge is not a consequence of apoptosis. The opposite scenario is more likely - apoptosis  
281 takes place following clone extrusion in the hinge. In the notum, 7 clones out of 23 examined  
282 contained apoptotic cells, and only 2 clones formed invaginations (Fig 4G). However, the  
283 majority of remaining clones displayed evidence of neither apoptosis nor extrusion. Notably,  
284 the presence of the unmarked twin-spots in the central notum suggests that mutant clones  
285 had already been eliminated from this region by either apoptosis or extrusion.

286 Altogether these data indicate that misspecified cells are removed by three different  
287 mechanisms: sorting, apoptosis and basal extrusion. Moreover, apoptosis dominates in the  
288 pouch, whereas extrusion is the main mechanism in the hinge.

289

### 290 **Extrusion occurs independently of apoptosis and takes over in the absence of cell death**

291

292 To assess the contribution of cell death to the elimination process, we prevented  
293 apoptosis in *ap<sup>DG8</sup>* cells by co-expression of the inhibitor of apoptosis *p35*. Wild-type, *UAS-*  
294 *p35*, *ap<sup>DG8</sup>* and *ap<sup>DG8</sup>* with *p35* clones were induced at early second instar and the discs of mid-  
295 third instar larvae were analyzed. The clones expressing only *p35* (Fig 5B) behaved similarly  
296 to the wild-type *GFP*-expressing clones (Fig 5A). In both cases, the clones did not display  
297 apoptosis, as revealed by the TUNEL assay. In contrast, dorsally located *ap* mutant clones  
298 induced apoptosis (Fig 5C). As expected, expression of *p35* within the clones perfectly  
299 inhibited apoptosis of clonal cells, but did not prevent induction of apoptosis outside the clone

300 (Fig 5D, upper insert). The expression of *p35* in the mutant clones significantly increased the  
301 number of recovered clones (Fig 5D-E). However, the number of mutant clones expressing  
302 *p35* was still lower than that of wild-type or *p35*-expressing clones (Fig 5E).

303

304 **Fig 5. In the absence of apoptosis misspecified clones become bigger and undergo extrusion.**

305 (A-D) Third instar wing discs with wild-type (A), *p35*-expressing (B), *ap<sup>DG8</sup>* (C) and *ap<sup>DG8</sup> p35*-expressing clones.  
306 The insets in C and D show enlarged images of single representative clones defined by arrows. (E) Clone recovery  
307 in the dorsal disc. 9 discs for each genotype were analyzed. (F) Plot shows areas of *ap<sup>DG8</sup>* and *ap<sup>DG8</sup> p35*-expressing  
308 clones. (G-G') *ap* mutant clones are eliminated from the dorsal pouch via extrusion when apoptosis is blocked.  
309 (G) Third instar wing disc containing *ap<sup>DG8</sup> p35*-expressing clones. (G') Zoom-in of the region defined by the white  
310 square in G. The XZ and YZ cross-sections throughout the clones located in the hinge and in the pouch are shown  
311 (XZ orientation: the apical side – up; YZ orientation: the apical side - left). Scale bars represent 50µm.

312

313 Thus, apoptosis inhibition only partially rescues the elimination of the misspecified  
314 clones. To determine whether apoptosis inhibition influenced the sorting efficiency and  
315 whether the clones are indeed eliminated from the tissue in the absence of apoptosis, we  
316 analyzed *ap<sup>DG8</sup>* clones expressing *p35* together with their wild-type sisters. The clones were  
317 induced at 46h AEL and analyzed at 80h, 90h and 100h AEL (similar to our time-course  
318 experiment in Fig 2). The quantification of sorting events and comparison to the results  
319 obtained with the *ap* mutant clones alone (Fig 2), revealed that the expression of *p35* did not  
320 change the sorting efficiency at any time-point (Fig S3A-D). Approximately 30% of clones were  
321 sorted to the ventral compartment (Fig S3D). In contrast, the number of mutant clones that  
322 were fully eliminated from the disc tissue were significantly lower when apoptosis was blocked  
323 (Fig S3E). However, about 18% of dorsal wild-type clones were found without their mutant  
324 sisters (Fig 3SB-C, arrows and 3SE). This directly indicates that the misspecified clones can be

325 eliminated from the tissue even in the absence of apoptosis. Many *ap* mutant clones with *p35*  
326 expression displayed evidence of basal extrusion. Interestingly, in this case cyst formation was  
327 observed not only in the hinge region but also in the notum and in the pouch (Fig 5G-G'). This  
328 suggests that extrusion does not depend on apoptosis and can serve as a back-up mechanism  
329 of clone elimination.

330

### 331 **Clone size is important for cyst-formation but not for clone elimination via extrusion**

332

333 One possible explanation of why the hinge clones but not the pouch ones undergo  
334 extrusion is the clone size. Misspecified clones in the hinge are larger than the ones in the  
335 pouch (Fig 4F). Therefore, we wondered whether clone size would be linked to the choice of  
336 elimination mechanism. This could also explain why clones in the pouch (and in the notum)  
337 begin extruding upon apoptosis inhibition: since many *ap* mutant clones in the pouch normally  
338 undergo apoptosis, they may not have a chance to reach the size required for extrusion, while  
339 apoptosis inhibition allows mutant clones to grow and reach a larger size (Fig 5F).

340 Thus, we asked whether changing the clone size affects their elimination in the  
341 presence and absence of apoptosis. To reduce the clone size we made use of *string* (*stg*) RNAi.  
342 *Stg* is an activator of the cyclin-dependent kinases. It regulates cell cycle progression by driving  
343 cells into mitosis (35). Accordingly, *stgRNAi* expressing cells proliferate slowly and the clones  
344 have smaller size compared to the wild-type clones (Fig S4A, S4C). However and importantly  
345 the expression of *stgRNAi* did not affect the clone recovery rate (Fig S4I). Therefore, *stgRNAi*  
346 expression and associated with it reduction of proliferation do not cause clone elimination per  
347 se. As previously, *p35* was used to prevent apoptosis within the clones (Fig S4B). The clones  
348 expressing both *p35* and *stgRNAi* combined both effects: they were smaller, and were

349 recovered at a higher rate than wild-type clones (Fig S4D, S4I). To modulate apoptosis and  
350 clone size in misspecified cells at the same time, we used *dLMO* flip-out clones instead of *ap*  
351 mitotic clones. Like *ap* mutant clones, *dLMO* flip-out clones induce ectopic boundary signaling  
352 and are efficiently eliminated from the dorsal compartment (Fig 6A, S4E, S4I; see also (11, 36)).  
353 The distribution of the elimination types the *dLMO* clones were undergoing in different  
354 regions mimics the one of *ap* mutant clones (Fig 6E, *dLMO*). Upon apoptosis inhibition the  
355 behavior of *dLMO* clones again resembled the behavior of *ap* mutant clones (Fig 6B, S4F): *p35*  
356 co-expression increased the clone recovery rate (Fig S4I) and led to clone extrusion in all  
357 regions of dorsal compartment (Fig 6E, *dLMO* + *p35*). Contrary to our expectations, the  
358 reduction of *dLMO* clone size did not influence the clone recovery rate (Fig 6C, S4G, S4I). These  
359 smaller *dLMO* clones were less likely to be associated with apoptosis and more frequently  
360 displayed invagination, shortening, and extrusion phenotypes, especially in the pouch and in  
361 the notum (Fig 6E, *dLMO* + *stgRNAi*). Moreover, when we reduce the size of *dLMO* expressing  
362 clones and prevent their apoptosis at the same time, most of misspecified clones underwent  
363 extrusion in all parts of the dorsal compartment (Fig 6D, 6E, *dLMO* + *stgRNAi* + *p35*). The fact  
364 that reduction of clone size does not prevent clone extrusion and does not increase the clone  
365 recovery rate suggest that elimination of misspecified clones via extrusion occurs regardless  
366 of the clone size.

367

368 **Fig 6. Clone size reduction does not prevent clone extrusion.**

369 (A-D) Third instar wing discs containing *dLMO* (A), *dLMO+p35* (B), *stgRNAi+dLMO* (C) and *stgRNAi+dLMO+p35*  
370 (D) clones. (E) Quantification of clones of the indicated genotypes in different regions of dorsal compartment  
371 depending on the evidence of elimination type: apoptosis, extrusion or apoptosis together with extrusion. The  
372 numbers of analyzed clones in each region are displayed above the bars. (F-G) Extrusion of large and small clones.  
373 Examples of large (*dLMO+p35*) (F) and small (*stgRNAi+dLMO+p35*) (G) misspecified clones at different stages (1-



374 5) of extrusion process. XZ cross-sections throughout the clones are shown (orientation: the apical side – up).  
375 The left panel: clones in green, nuclear staining (Dapi) in blue, Wg staining in red; the middle panel - nuclear and  
376 Wg staining alone; right panel – schematic representation of morphological changes. The initial steps of extrusion  
377 of both large and small clones involve apical constriction and reduction of cell height (cell shortening) from the  
378 apical side (F and G, 1-2). Propagation of those processes, especially cell shortening, in case of large clones leads  
379 to cyst formation, where apical sides of clonal cells face the newly-formed cavity (F, 3-4). In contrast, small clones  
380 do not form cysts, although the cells reduce their height further and get extruded from the tissue (G, 3-4). Finally,  
381 the wild-type neighboring cells fuse above the clones and restore epithelium integrity (F and G, 5). Scale bars  
382 represent 100µm.

383

384         Although the small size does not prevent the misspecified clones from being extruded,  
385 such clones extrude from the tissue in a different way than the larger ones do. Careful analysis  
386 of *dLMO + p35* and *dLMO + p35 + stgRNAi* clone morphology showed that *dLMO + p35* clones,  
387 which were generally of medium to large size (more than 6 cells), form cyst-like structures  
388 with a cavity inside, whereas small clones (1 - 6 cells) did not. Most clones expressing *stgRNAi*  
389 were clones of the small size. During our analysis, we found clones at different steps of  
390 extrusion process from which we could reconstruct the whole process for both the large (Fig  
391 6F) and the small (Fig 6G) clones. At the first step the large clones experience shrinkage of the  
392 apical surface (Fig 6F-1). At the same time clonal cells, especially cells in the clone center, get  
393 shorter leading to clone invagination (Fig 6F-2). Eventually all cells in the clone are reduced in  
394 height and the clone forms a cyst-like structure (Fig 6F-3). The cyst is pushed out from the  
395 tissue plane and becomes enclosed (Fig 6F-4). After the cyst extrusion is complete, the disc  
396 epithelium restores its integrity (Fig 6F-5). The small clones also begin the extrusion process  
397 by constriction of their apical areas, expansion of the basal side and cell shortening (Fig 6G-1).  
398 These changes lead to local tissue invagination (Fig 6G-2, -3). Further reduction of clone height

399 causes clone extrusion. At the same time, neighboring wild-type cells establish contacts above  
400 the extruding clone (Fig 6G-4) and the tissue restores its integrity and shape (Fig 6G-5). In  
401 conclusion, unlike large clones, small clones do not form cyst-like structures, however both  
402 types of clones can leave the tissue via basal extrusion. The apical constriction and cell  
403 shortening are the common changes resulting in local tissue invagination and clone extrusion.

404

405

## 406 **DISCUSSION**

407

408 Here we studied the behavior of cells misspecified for the dorso-ventral identity. Using  
409 a non-canonical FRT site (33) we induced *ap* mutant clones and analyzed their behavior in the  
410 dorsal compartment. Interestingly, the misspecified cells are not eliminated immediately after  
411 induction. Initially, we suspected that the clones needed to reach a certain size to initiate  
412 elimination. However, our data shows that the clone size is not a decisive parameter for the  
413 elimination. The misspecified cell clones, as small as 1 cell, can be extruded from the epithelia.  
414 Alternatively, the effect might be due to Ap protein or the transcript stability. In this scenario,  
415 bringing Ap below a certain threshold simply requires time or several divisions that would  
416 dilute the protein level in each cell. Although the misspecified clones are able to grow within  
417 the first 24h, most of them are recognized and effectively eliminated from the dorsal  
418 compartment within the following 10h. We have defined 3 mechanisms that ensure their  
419 elimination: sorting to the opposite compartment, apoptosis and basal extrusion.

420

### 421 **Sorting to the opposite compartment**

422

423           The phenomenon, when dorsal cells mutant for *ap* cross the boundary and join the  
424 ventral compartment, has been observed in the early work defining Ap as the dorsal  
425 determinant (32). Importantly, this ability of cells to swap compartments according to their  
426 identity contributes to the elimination of misspecified cells. We found that up to 30% of  
427 mutant clones of dorsal origin leave the compartment via this mechanism. Three main events  
428 make clone sorting possible: the induction of ectopic boundary signaling around the clone,  
429 incorporation of this signaling into the compartment boundary, leading to loops protruding  
430 from the D/V boundary, and boundary straightening. How boundary straightening occurs is  
431 not known. However, it is very likely that the mechanisms that maintain the boundary straight  
432 during normal development are in effect here. For instance, it was shown that the D/V  
433 boundary has distinct physical parameters such as increased cell bond tension, cell elongation  
434 and oriented cell division, which tightly correlate with the boundary morphology and ensure  
435 its straightness (37). Importantly, the increased tension depends on Ap and Notch activity (38).  
436 Therefore, it is possible that the mechanical changes associated with displaced signaling help  
437 to bring D/V boundary to the normal shape. Notably, the ability of misspecified dorsal clones  
438 cross into the ventral compartment even after D/V boundary formation suggests that the  
439 signaling center is a very flexible and dynamic structure. It can be rearranged at any time  
440 during development in order to meet tissue needs.

441

#### 442 **Apoptosis and Extrusion**

443

444           Although some misspecified clones, the ones that are close to the D/V boundary, can  
445 escape to the opposite compartment and survive, the majority of misspecified clones are  
446 completely eliminated from the disc tissue either via apoptosis or basal extrusion.

447 Interestingly, apoptosis activation occurs in both the misspecified cells and the juxtaposing  
448 wild type cells. Moreover, inhibition of apoptosis in the clones does not prevent its non-  
449 autonomous activation. This suggests that apoptosis activation rely rather on interaction of  
450 cells with different fate identities than on misspecified cells themselves. Similar autonomous  
451 and non-autonomous activation of apoptosis was reported for the adjacent cells that  
452 experience discontinuity in the reception of either the Dpp or Wg signaling (21).

453 A former study by Marco Milan and colleagues reported that *p35* co-expression  
454 rescued dLMO clones of dorsal origin completely (11). In our set up the rescue effect of *p35*  
455 was also significant, however incomplete (Fig 5E and S3). We find that in addition to apoptosis,  
456 basal extrusion also contributes to the elimination of cells misspecified for the D/V position.  
457 The underlying reason of the discrepancy between the published results and ours might be  
458 the timing of clone induction, as the later induced clones are more likely to escape the  
459 elimination mechanisms in place. Another important factor that could contribute to the  
460 differences between *p35* rescue experiments is that the analysis in Milan paper was restricted  
461 to the pouch region, whereas we analyzed clones throughout the whole dorsal compartment.  
462 Therefore, we suspect that earlier clone induction along with quantification in the whole disc  
463 allowed us to recognize the contribution of basal extrusion to the process of clone elimination.

464

#### 465 **Region specificity**

466

467 Interestingly, apoptosis and extrusion display strong region preferences: apoptosis  
468 dominates in the pouch whereas extrusion occurs preferentially in the hinge. Such an  
469 interesting pattern could rely on three factors. First, the cyto-architectural properties of the  
470 hinge and the pouch regions are different. Cells in the wing pouch have a long and narrow

471 shape along their apical-basal axes, whereas cells in the hinge are shorter and wider (13, 39).  
472 This makes the hinge region mechanically more disposed to bulging (40). Second, the hinge  
473 region is resistant to irradiation and drug-induced apoptosis due to low levels of the pro-  
474 apoptotic gene *reaper* in that region (41). Third, we find that *ap* mutant clones in the dorsal  
475 pouch and dorsal hinge have different effects on cell proliferation. The misspecified clones in  
476 the hinge increase cell proliferation in both an autonomous and a non-autonomous manner.  
477 By contrast, the clones in the pouch either grow at the normal rate or even slightly inhibit cell  
478 proliferation (Fig S5). Most likely these effects are mediated by ectopic Notch/Wg signaling  
479 induced at the clone boundary. Indeed, it was reported that Notch or Wg misexpression  
480 increases cell proliferation and causes strong overgrowth in the hinge but not in the pouch  
481 (10, 13, 23, 42). Thus, the extrusion of misspecified clones in the hinge could be driven by local  
482 crowding, which was shown to be linked to extrusion in the *Drosophila* pupal notum (43, 44).  
483 However, our data suggests that the role of local crowding can be at most minor with regards  
484 to the extrusion of *ap* mutant clones. First of all, in the absence of apoptosis, the extrusion of  
485 *ap* clones occurs rather frequently not only in the hinge but also in the pouch and in the  
486 notum, where the clones do not induce overgrowth. In addition, the clones with artificially  
487 reduced size (*dLMO+p35+stgRNAi*) are still extruded from the epithelium despite the lack of  
488 the crowding effect (Fig 6E and 6G). Overall, we think that it is the in-built apoptotic resistance  
489 in the hinge, rather than differential proliferation patterns that favors extrusion in the hinge.

490 Here, we described three mechanisms that ensure clearance of cells with incorrect D/V  
491 identity and their regional bias. We also find that the elimination of misspecified cells is more  
492 efficient earlier in development. This suggests that the ability of developing tissue to remove  
493 inappropriately specified cells and actively maintain the compartment organization requires  
494 some tissue plasticity that diminishes over time.

## 495 **MATERIALS AND METHODS**

496

### 497 **Fly stocks**

498

499 The following fly stocks were used in this study: *ap<sup>DG8</sup>* (described in Bieli et al., 2015),  
500 *FRT<sup>f00878</sup>* (described in Bieli et al., 2015), *UAS-dLMO* (was kindly provided by Marco Milan),  
501 *UAS-Ap* (was kindly provided by Markus Affolter), *UAS-p35* (was kindly provided by Nicole  
502 Grieder); *UAS-stgRNAi* (GD, 330033) obtained from the Vienna Drosophila Resource Center  
503 (VDRC). All crosses were kept on standard media at 25°C. Flipase expression was induced by a  
504 heat-shock at 37°C. The detailed fly genotypes and heat-shock induction conditions are  
505 presented in Table S1.

506

### 507 **Immunostaining and sample preparation**

508

509 Imaginal discs were prepared and stained using standard procedures. Briefly, larvae  
510 were dissected and fixed in 4% paraformaldehyde (PFA) in PBS for 20 min. Washes were  
511 performed in PBS + 0.03% Triton X-100 (PBT) and blocking in PBT+2% normal donkey serum  
512 (PBTN). Samples were incubated with primary antibodies overnight at 4°C. The primary  
513 antibodies used: mouse anti-Wg (1:2000, deposited to the DSHB by Cohen, S.M. (DSHB  
514 Hybridoma Product 4D4-concentrated)). Secondary antibodies were incubated for 2hr at  
515 room temperature. The secondary antibodies used: anti-mouse Alexa 568 and Alexa 633. Discs  
516 were mounted in Vectashield antifade mounting medium with Dapi (Vector Laboratories). For  
517 F-actin staining Phalloidin-Tetramethylrhodamine B (Fluka #77418) was added during  
518 incubation with secondary antibodies at the concentration 0.3 µM. For adult wing sample

519 preparation, the flies of desired genotypes were collected and fixed in 70% ethanol. The wings  
520 were isolated and mounted in 3:1 Canadian balsam : Methyl Salicylate.

521

## 522 **TUNEL assay**

523

524 For the TUNEL assay In Situ Cell Death Detection kit, TMR red (Roche) was used. Larvae  
525 were dissected in cold PBS and fixed in 4% PFA for 1hr at 4°C. Samples were washed in PBT  
526 and blocked in PBTN for 1 hr. Next, samples were incubated with primary antibodies overnight  
527 at 4°C and with secondary antibodies for 4hr at 4°C. After washing the tissues were blocked in  
528 PBTN overnight at 4°C. Then, samples were permeabilized in 100 mM sodium citrate  
529 supplemented with 0.1% Triton X-100 and incubated in 50 µl of TUNEL reaction mix (prepared  
530 according to the recipe from the kit) for 2 hr at 37°C in dark. After this step, the samples were  
531 washed in PBT for 30 min and mounted in Vectashield antifade mounting medium with Dapi  
532 (Vector Laboratories).

533

## 534 **EdU labeling**

535

536 For the EdU assay Click-iT EdU Alexa Fluor 594 imaging kit (Invitrogen #C10339) was  
537 used. Larvae were dissected in Schneider's Medium at room temperature and incubated for 1  
538 hr at 25°C in 15 µM EdU working solution supplemented with 1% normal donkey serum. After  
539 the EdU incorporation, the tissue was washed in PBS supplemented with 3% bovine serum  
540 albumin (BSA) and fixed in 4% PFA for 20 min. Next steps, including blocking, incubation with  
541 primary and secondary antibodies, were done according to the standard immunostaining  
542 protocol. After washing the tissues were permeabilized by 3 washes (10 minutes each) in 0.1%

543 Triton X-100 in PBS. The EdU reaction cocktail was prepared according to the recipe from the  
544 kit. The samples were incubated in 250  $\mu$ l of the EdU reaction cocktail for 30 min at room  
545 temperature in dark. After that the samples were washed in PBT for 30 min and mounted in  
546 Vectashield antifade mounting medium with Dapi (Vector Laboratories).

547

## 548 **Image acquisition and analysis**

549

550 Image stacks of wing discs were acquired on Zeiss LSM710 or LSM880 confocal  
551 microscopes using 20x or 40x objectives. In most cases 15-30 Z-sections 1  $\mu$ m apart were  
552 collected. Image stacks were projected using maximum projection and analyzed using  
553 workflows established in ImageJ. The images shown on Fig 4E-E', 4F', 5G', 6F, 6G and all images  
554 used for the analysis of the elimination type (Fig 4G and 6E) were acquired using a 40x  
555 objective. In this case, 80-130 Z-sections 0.4-0.7  $\mu$ m apart were collected. The orthogonal  
556 views throughout clone centers were used to define clones under extrusion. Statistical  
557 analysis was done in R, v3.5.0. Conditions were compared using two-sample t-test.  
558 Comparisons with a p-value > 0.05 were marked as "ns" (non-significant); p-value  $\leq$  0.05 – " \*  
559 "; p-value  $\leq$  0.01 – " \*\* "; p-value  $\leq$  0.001 – " \*\*\* ".

560

561

## 562 **ACKNOWLEDGEMENTS**

563

564 We are grateful to M. Müller, D. Bieli and M. Affolter of Biozentrum Basel for reagents  
565 and discussions. We thank M. Milan (IRB, Barcelona) and VDRC for providing fly stocks and



566 DSHB for anti-Wg antibodies. Confocal microscopy was performed at the Cellular Imaging  
567 Facility of the University of Lausanne. We thank V. Dion for comments on the manuscript.

568

569

570 **REFERENCES**

571

- 572 1. Morata G, Lawrence PA. Control of compartment development by the engrailed gene in  
573 *Drosophila*. *Nature*. 1975;255(5510):614-7.
- 574 2. Kornberg T, Sidén I, O'Farrell P, Simon M. The engrailed locus of *Drosophila*: in situ  
575 localization of transcripts reveals compartment-specific expression. *Cell*. 1985;40(1):45-  
576 53.
- 577 3. Diaz-Benjumea FJ, Cohen SM. Interaction between dorsal and ventral cells in the imaginal  
578 disc directs wing development in *Drosophila*. *Cell*. 1993;75(4):741-52.
- 579 4. Couso JP, Knust E, Martinez Arias A. Serrate and wingless cooperate to induce vestigial  
580 gene expression and wing formation in *Drosophila*. *Curr Biol*. 1995;5(12):1437-48.
- 581 5. Klein T, Arias AM. Different spatial and temporal interactions between Notch, wingless,  
582 and vestigial specify proximal and distal pattern elements of the wing in *Drosophila*. *Dev*  
583 *Biol*. 1998;194(2):196-212.
- 584 6. Azpiazu N, Morata G. Function and regulation of homothorax in the wing imaginal disc of  
585 *Drosophila*. *Development*. 2000;127(12):2685-93.
- 586 7. Zirin JD, Mann RS. Differing strategies for the establishment and maintenance of teashirt  
587 and homothorax repression in the *Drosophila* wing. *Development*. 2004;131(22):5683-  
588 93.
- 589 8. Letizia A, Barrio R, Campuzano S. Antagonistic and cooperative actions of the EGFR and  
590 Dpp pathways on the iroquois genes regulate *Drosophila* mesothorax specification and  
591 patterning. *Development*. 2007;134(7):1337-46.

- 592 9. Bielmeier C, Alt S, Weichselberger V, La Fortezza M, Harz H, Jülicher F, et al. Interface  
593 Contractility between Differently Fated Cells Drives Cell Elimination and Cyst Formation.  
594 Curr Biol. 2016;26(5):563-74.
- 595 10. Giraldez AJ, Cohen SM. Wingless and Notch signaling provide cell survival cues and control  
596 cell proliferation during wing development. Development. 2003;130(26):6533-43.
- 597 11. Milán M, Pérez L, Cohen SM. Short-range cell interactions and cell survival in the  
598 Drosophila wing. Dev Cell. 2002;2(6):797-805.
- 599 12. Baena-Lopez LA, García-Bellido A. Control of growth and positional information by the  
600 graded vestigial expression pattern in the wing of Drosophila melanogaster. Proc Natl  
601 Acad Sci U S A. 2006;103(37):13734-9.
- 602 13. Widmann TJ, Dahmann C. Wingless signaling and the control of cell shape in Drosophila  
603 wing imaginal discs. Dev Biol. 2009;334(1):161-73.
- 604 14. Villa-Cuesta E, González-Pérez E, Modolell J. Apposition of iroquois expressing and non-  
605 expressing cells leads to cell sorting and fold formation in the Drosophila imaginal wing  
606 disc. BMC Dev Biol. 2007;7:106.
- 607 15. Nellen D, Burke R, Struhl G, Basler K. Direct and long-range action of a DPP morphogen  
608 gradient. Cell. 1996;85(3):357-68.
- 609 16. Restrepo S, Zartman JJ, Basler K. Coordination of patterning and growth by the  
610 morphogen DPP. Curr Biol. 2014;24(6):R245-55.
- 611 17. Hamaratoglu F, Affolter M, Pyrowolakis G. Dpp/BMP signaling in flies: from molecules to  
612 biology. Semin Cell Dev Biol. 2014;32:128-36.
- 613 18. Baena-Lopez LA, Nojima H, Vincent JP. Integration of morphogen signalling within the  
614 growth regulatory network. Curr Opin Cell Biol. 2012;24(2):166-72.

- 615 19. Zecca M, Basler K, Struhl G. Direct and long-range action of a wingless morphogen  
616 gradient. *Cell*. 1996;87(5):833-44.
- 617 20. Moreno E, Basler K, Morata G. Cells compete for decapentaplegic survival factor to  
618 prevent apoptosis in *Drosophila* wing development. *Nature*. 2002;416(6882):755-9.
- 619 21. Adachi-Yamada T, O'Connor MB. Morphogenetic apoptosis: a mechanism for correcting  
620 discontinuities in morphogen gradients. *Dev Biol*. 2002;251(1):74-90.
- 621 22. Burke R, Basler K. Dpp receptors are autonomously required for cell proliferation in the  
622 entire developing *Drosophila* wing. *Development*. 1996;122(7):2261-9.
- 623 23. Johnston LA, Sanders AL. Wingless promotes cell survival but constrains growth during  
624 *Drosophila* wing development. *Nat Cell Biol*. 2003;5(9):827-33.
- 625 24. Gibson MC, Perrimon N. Extrusion and death of DPP/BMP-compromised epithelial cells  
626 in the developing *Drosophila* wing. *Science*. 2005;307(5716):1785-9.
- 627 25. Shen J, Dahmann C. Extrusion of cells with inappropriate Dpp signaling from *Drosophila*  
628 wing disc epithelia. *Science*. 2005;307(5716):1789-90.
- 629 26. Cohen B, McGuffin ME, Pfeifle C, Segal D, Cohen SM. *apterous*, a gene required for  
630 imaginal disc development in *Drosophila* encodes a member of the LIM family of  
631 developmental regulatory proteins. *Genes Dev*. 1992;6(5):715-29.
- 632 27. Doherty D, Feger G, Younger-Shepherd S, Jan LY, Jan YN. Delta is a ventral to dorsal signal  
633 complementary to Serrate, another Notch ligand, in *Drosophila* wing formation. *Genes*  
634 *Dev*. 1996;10(4):421-34.
- 635 28. Irvine KD, Wieschaus E. *fringe*, a Boundary-specific signaling molecule, mediates  
636 interactions between dorsal and ventral cells during *Drosophila* wing development. *Cell*.  
637 1994;79(4):595-606.

- 638 29. Panin VM, Papayannopoulos V, Wilson R, Irvine KD. Fringe modulates Notch-ligand  
639 interactions. *Nature*. 1997;387(6636):908-12.
- 640 30. Diaz-Benjumea FJ, Cohen SM. Serrate signals through Notch to establish a Wingless-  
641 dependent organizer at the dorsal/ventral compartment boundary of the *Drosophila*  
642 wing. *Development*. 1995;121(12):4215-25.
- 643 31. Micchelli CA, Blair SS. Dorsoventral lineage restriction in wing imaginal discs requires  
644 Notch. *Nature*. 1999;401(6752):473-6.
- 645 32. Blair SS, Brower DL, Thomas JB, Zavortink M. The role of apterous in the control of  
646 dorsoventral compartmentalization and PS integrin gene expression in the developing  
647 wing of *Drosophila*. *Development*. 1994;120(7):1805-15.
- 648 33. Bieli D, Kanca O, Requena D, Hamaratoglu F, Gohl D, Schedl P, et al. Establishment of a  
649 Developmental Compartment Requires Interactions between Three Synergistic Cis-  
650 regulatory Modules. *PLoS Genet*. 2015;11(10):e1005376.
- 651 34. Bieli D, Kanca O, Gohl D, Denes A, Schedl P, Affolter M, et al. The *Drosophila melanogaster*  
652 Mutants *apblot* and *apXasta* Affect an Essential apterous Wing Enhancer. *G3 (Bethesda)*.  
653 2015;5(6):1129-43.
- 654 35. Lee LA, Orr-Weaver TL. Regulation of cell cycles in *Drosophila* development: intrinsic and  
655 extrinsic cues. *Annu Rev Genet*. 2003;37:545-78.
- 656 36. Milán M, Cohen SM. A re-evaluation of the contributions of Apterous and Notch to the  
657 dorsoventral lineage restriction boundary in the *Drosophila* wing. *Development*.  
658 2003;130(3):553-62.
- 659 37. Aliee M, Röper JC, Landsberg KP, Pentzold C, Widmann TJ, Jülicher F, et al. Physical  
660 mechanisms shaping the *Drosophila* dorsoventral compartment boundary. *Curr Biol*.  
661 2012;22(11):967-76.

- 662 38. Michel M, Aliee M, Rudolf K, Bialas L, Jülicher F, Dahmann C. The Selector Gene *apterous*  
663 and Notch Are Required to Locally Increase Mechanical Cell Bond Tension at the  
664 *Drosophila* Dorsoventral Compartment Boundary. *PLoS One*. 2016;11(8):e0161668.
- 665 39. Legoff L, Rouault H, Lecuit T. A global pattern of mechanical stress polarizes cell divisions  
666 and cell shape in the growing *Drosophila* wing disc. *Development*. 2013;140(19):4051-9.
- 667 40. Tamori Y, Suzuki E, Deng WM. Epithelial Tumors Originate in Tumor Hotspots, a Tissue-  
668 Intrinsic Microenvironment. *PLoS Biol*. 2016;14(9):e1002537.
- 669 41. Verghese S, Su TT. *Drosophila* Wnt and STAT Define Apoptosis-Resistant Epithelial Cells  
670 for Tissue Regeneration after Irradiation. *PLoS Biol*. 2016;14(9):e1002536.
- 671 42. Baonza A, Garcia-Bellido A. Notch signaling directly controls cell proliferation in the  
672 *Drosophila* wing disc. *Proc Natl Acad Sci U S A*. 2000;97(6):2609-14.
- 673 43. Marinari E, Mehonic A, Curran S, Gale J, Duke T, Baum B. Live-cell delamination  
674 counterbalances epithelial growth to limit tissue overcrowding. *Nature*.  
675 2012;484(7395):542-5.
- 676 44. Levayer R, Dupont C, Moreno E. Tissue Crowding Induces Caspase-Dependent  
677 Competition for Space. *Curr Biol*. 2016;26(5):670-7.
- 678
- 679

680 **SUPPORTING INFORMATION CAPTIONS**

681

682 **Fig S1. Sorting and elimination of wild type clones in the control discs are very rare events.**

683 (A-C) Wing discs of the indicated times containing wild-type sister clones that are marked by  
684 either 2 copies of GFP or absence of GFP. (A'-C') Wg channel of A-C. Quantifications of the  
685 remained, sorted and eliminated wild-type clones are shown on the Fig 2G-I, blue lines. Scale  
686 bars represent 50 $\mu$ m.

687

688 **Fig S2. *ap* mutant cell clones cause deformations in adult wings.**

689 (A) Wild-type wing. (B-G) Wings after induction of *ap*<sup>DG8</sup> clones during second instar contain  
690 different deformations: ectopic margin formation (B); wing margin duplication (C-C',  
691 arrowheads); blister-like outgrowths (D-E); and wing duplications (F-G). Scale bars represent  
692 500 $\mu$ m.

693

694 **Fig S3. Apoptosis inhibition does not rescue all mis-specified clones.**

695 (A-C) Wing imaginal discs of indicated times with *ap*<sup>DG8</sup> clones expressing *p35* (marked by two  
696 copies of GFP) and wild-type sister clones (marked by the absence of GFP). Arrows point to  
697 wild-type clones that lost their mutant sisters; (D-E) Comparison of the amount of *ap*<sup>DG8</sup> clones  
698 (data from the Fig 2) with the amount of *ap*<sup>DG8</sup> + *p35* clones that were sorted to the ventral  
699 compartment (D) or completely eliminated (E). At least 15 discs with *ap*<sup>DG8</sup> clones and 12 discs  
700 with *ap*<sup>DG8</sup> + *p35* clones were analyzed. Scale bars represent 50 $\mu$ m.

701

702 **Fig S4. The reduction of clone size does not affect their recovery.**

703 (A-H) Third instar wing discs containing wild-type (A), *p35* (B), *stgRNAi* (C), *p35+stgRNAi* (D),  
704 *dLMO* (E), *dLMO+p35* (F), *stgRNAi+dLMO* (G) and *stgRNAi+dLMO+p35* (H) clones. (I) Clone  
705 recovery rate in dorsal compartment for each genotype. Scale bars represent 100 $\mu$ m.

706

707 **Fig S5. *ap* mutant clones increase cell proliferation in the dorsal hinge but not in the dorsal**  
708 **pouch.**

709 EdU cell proliferation assay of the third instar wing disc containing *ap<sup>DG8</sup>* clones. (A) Merged  
710 image (*ap<sup>DG8</sup>* clones, EdU and Wg staining). (A') EdU channel alone. (A'') EdU and Wg channels.  
711 (A''') *ap<sup>DG8</sup>* clones and EdU staining. The insets show enlarge images of single clones from  
712 dorsal pouch (P) and dorsal hinge (H). Scale bar represents 50 $\mu$ m.

713

714 **Table S1. Genotypes and experimental conditions.**

715 Detailed genotypes and experimental conditions of data represented on individual figure.

716

717



**Fig 1**

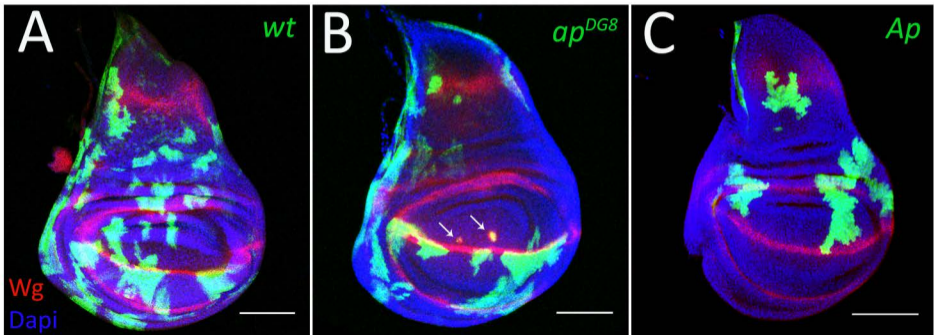

**Fig 2****A**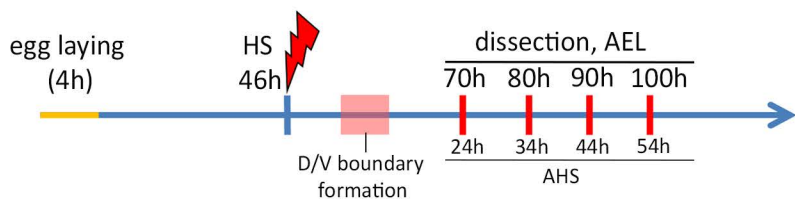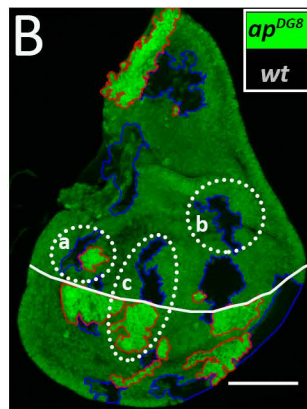

Time AEL  
Time AHS

70h  
24h

80h  
34h

90h  
44h

100h  
54h

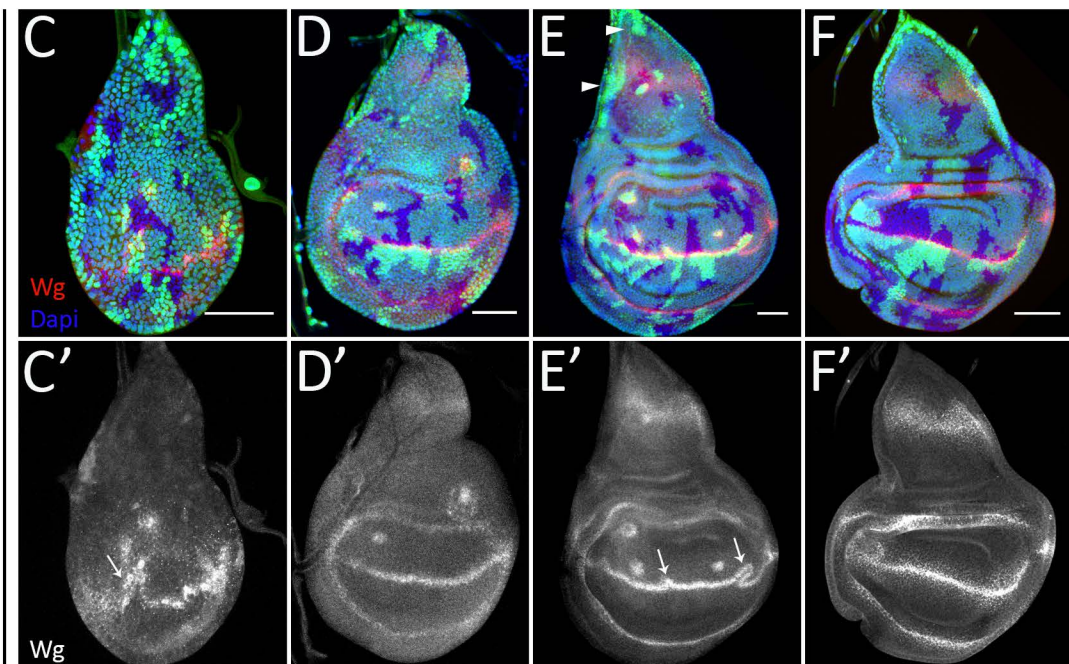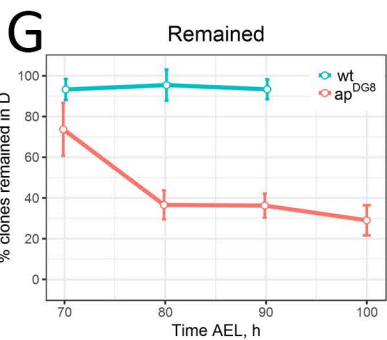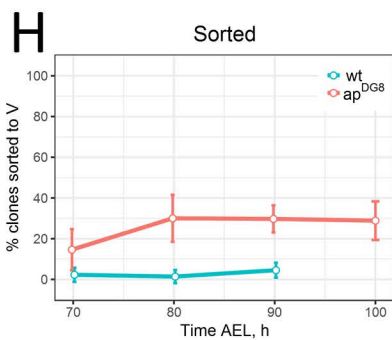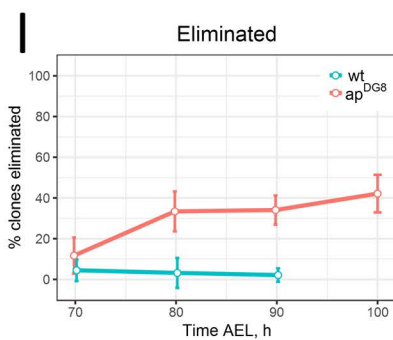

**Fig 3**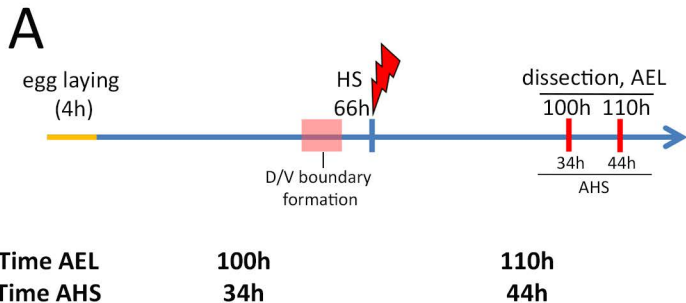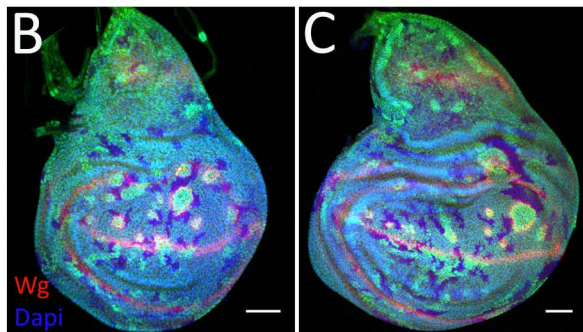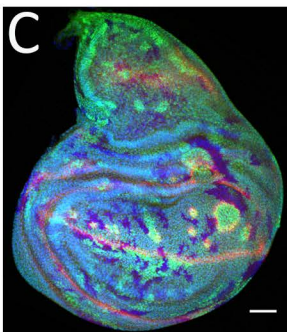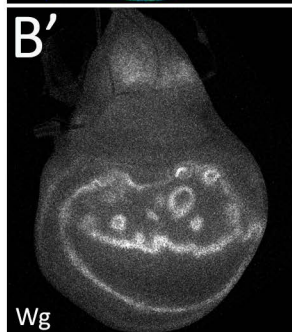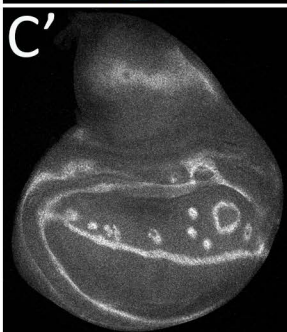**D** The efficiency of clone removal at 34h AHS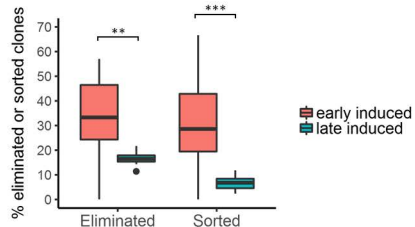**E** The efficiency of clone removal at 44h AHS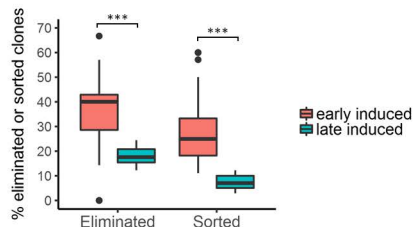**F** The effect of clones induced at different times on adult wings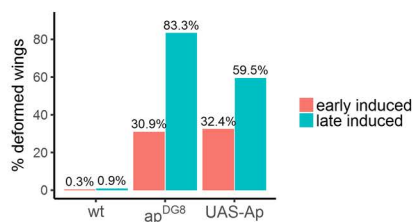

**Fig 4**

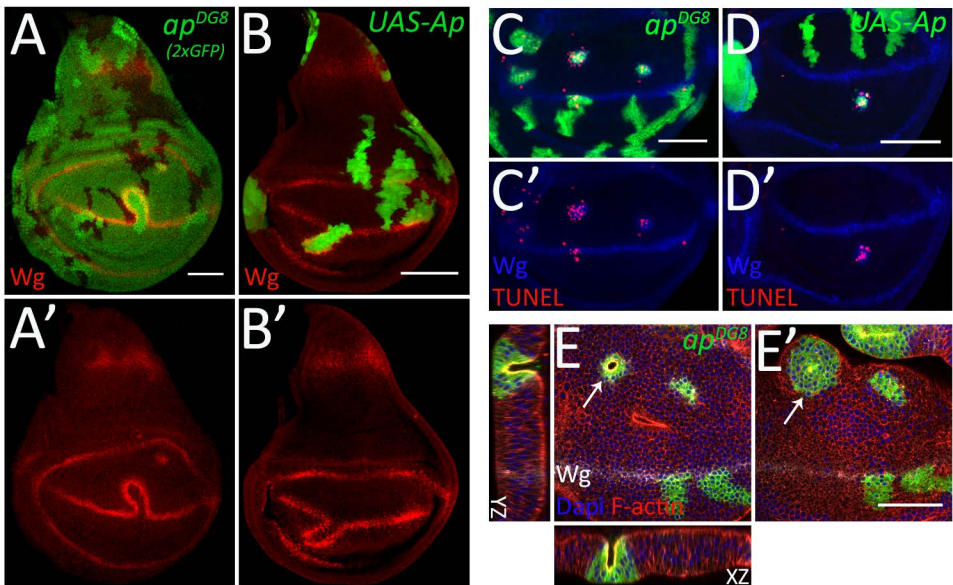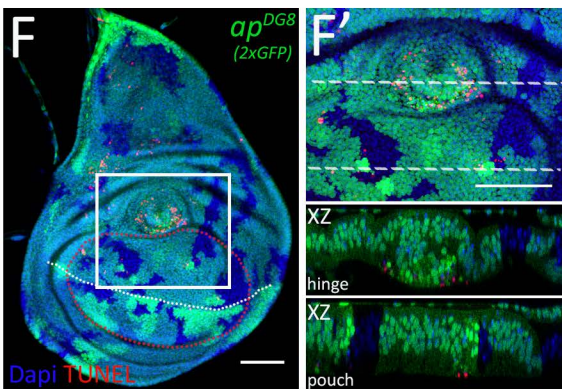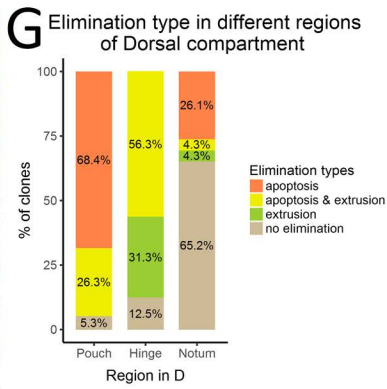

**Fig 5**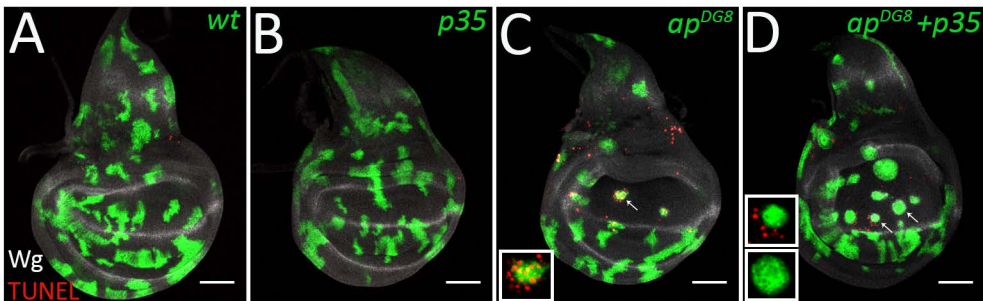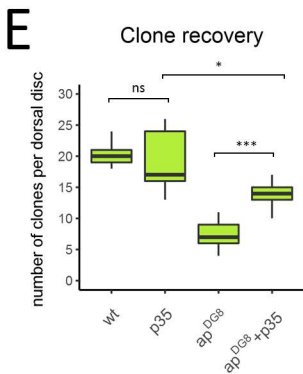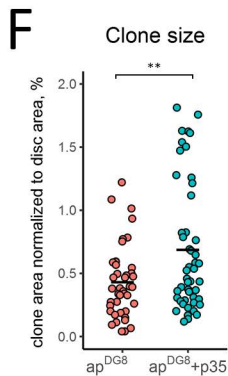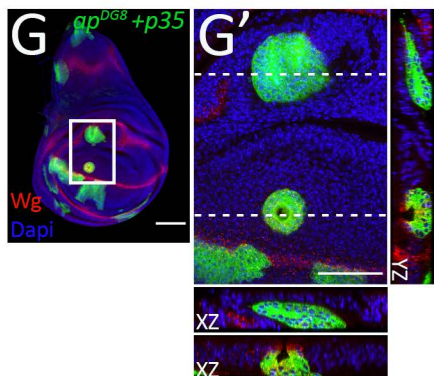



**Fig 6**

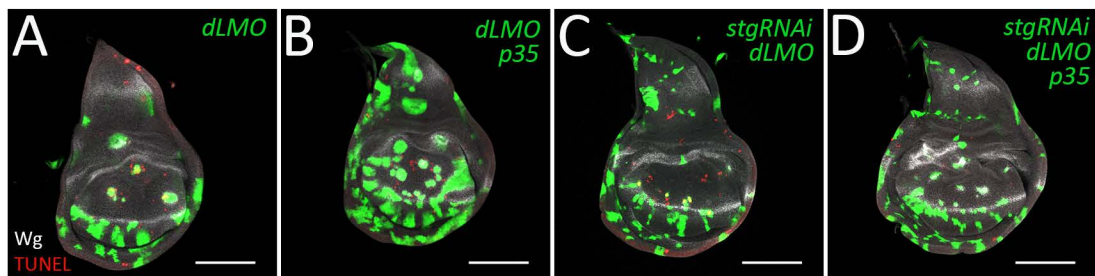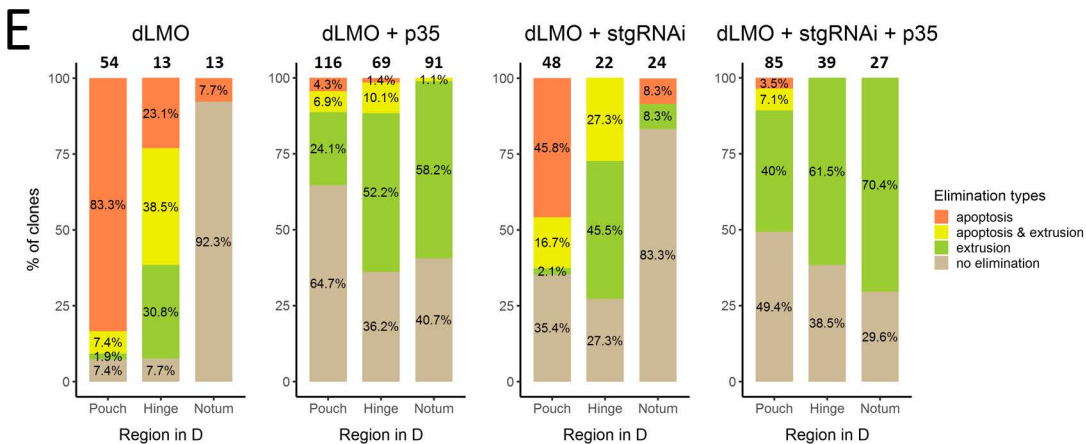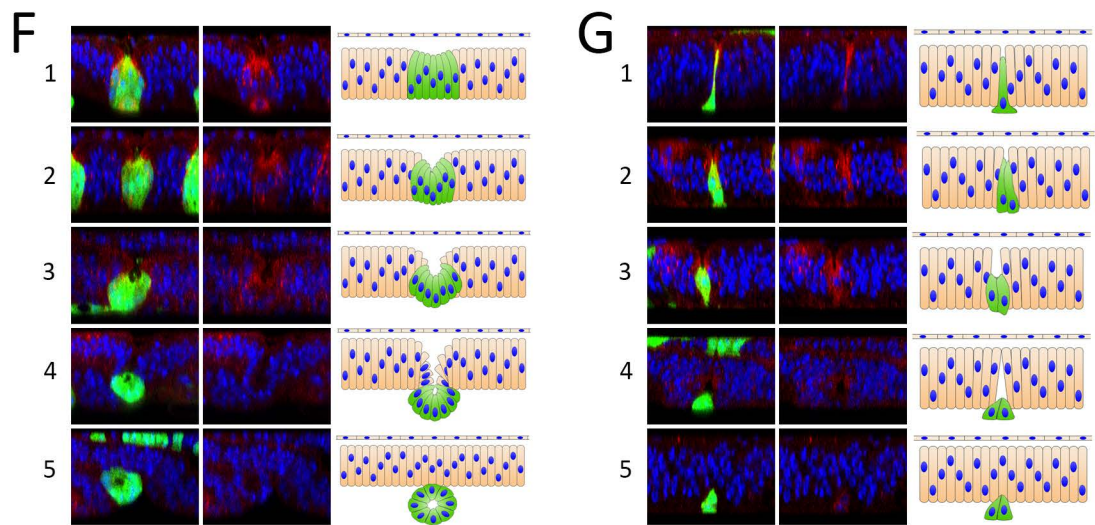

# Fig S1

Time AEL  
Time AHS

70h  
24h

80h  
34h

90h  
44h

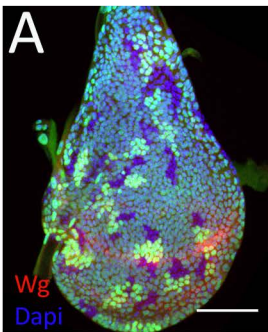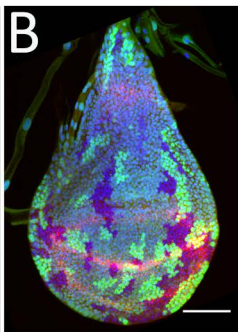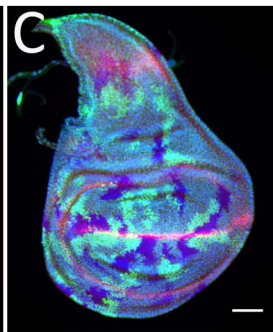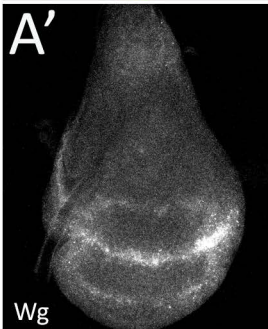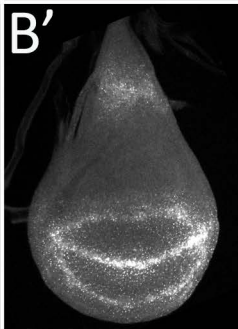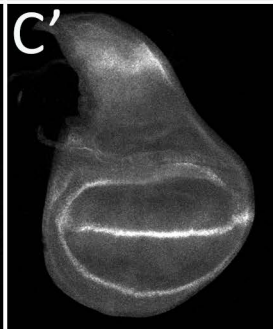

*wt*

*wt*

**Fig S2**

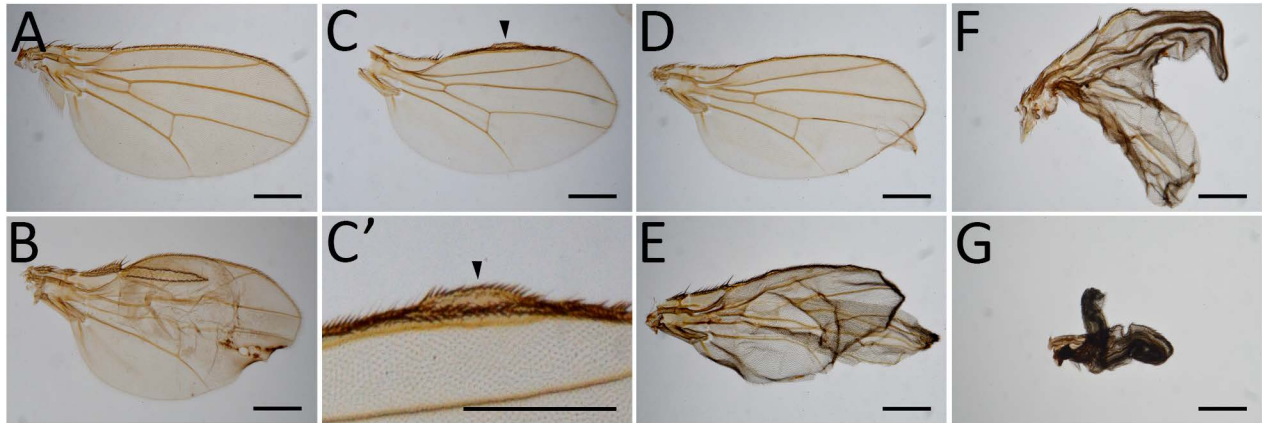



# Fig S3

Time AEL  
Time AHS

80h  
34h

90h  
44h

100h  
54h

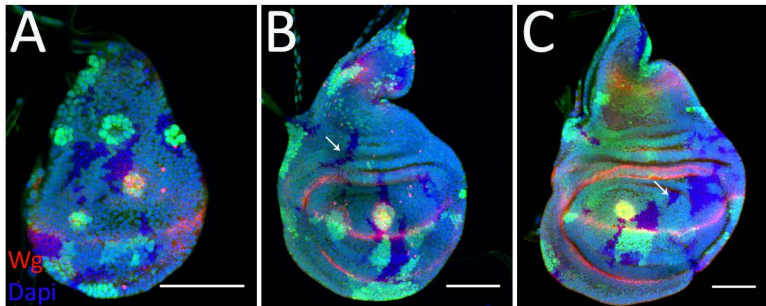

**D** Clone sorting upon apoptosis inhibition

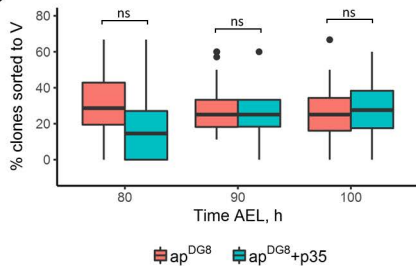

**E** Clone elimination upon apoptosis inhibition

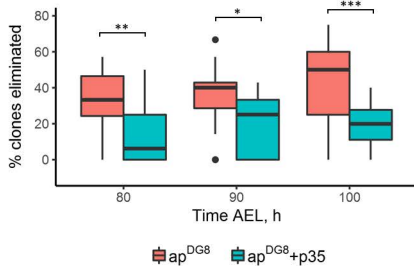

Fig S4

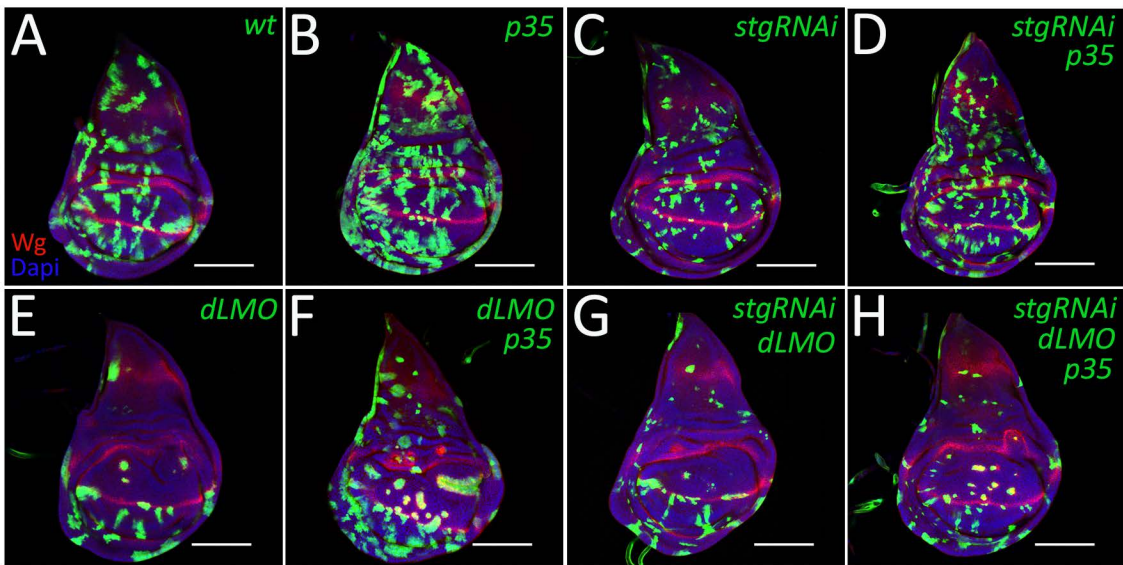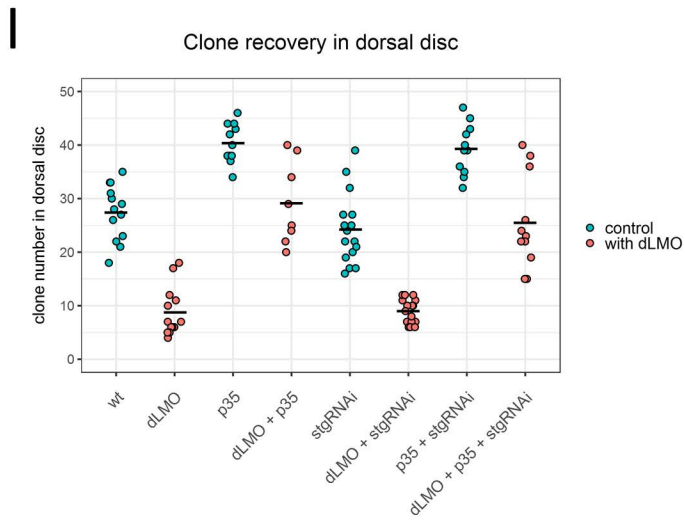

Fig S5

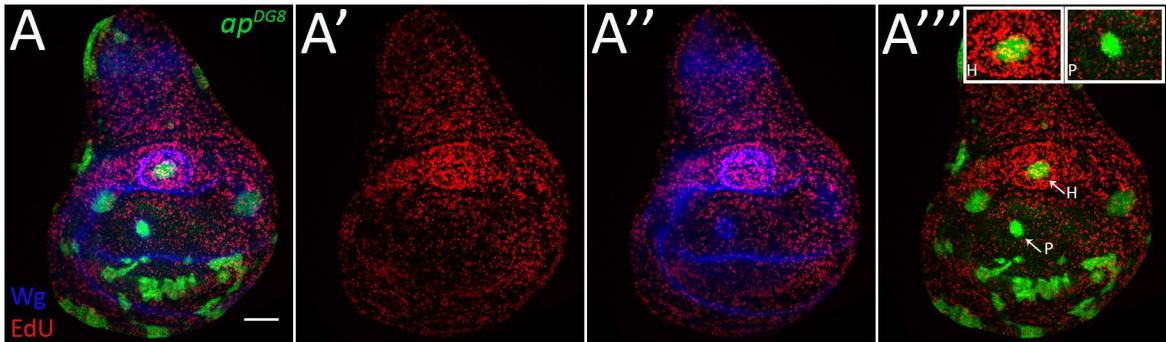

**Table S1**

| Figure | Genotype                                                                                                               | Time AEL, h    |            |            | Heat-shock duration, min |
|--------|------------------------------------------------------------------------------------------------------------------------|----------------|------------|------------|--------------------------|
|        |                                                                                                                        | Egg collection | Heat-shock | Dissection |                          |
| 1A     | <i>yw hsflp /yw; FRT<sup>f00878</sup> / FRT<sup>f00878</sup> tub-Gal80; tub-Gal4 UAS-GFP/+</i>                         | 4              | 48-52      | 110-114    | 30                       |
| 1B     | <i>yw hsflp /yw; FRT<sup>f00878</sup> ap<sup>DG8</sup> / FRT<sup>f00878</sup> tub-Gal80; tub-Gal4 UAS-GFP / +</i>      | 4              | 48-52      | 110-114    | 30                       |
| 1C     | <i>yw hsflp / w; UAS-Ap / +; act&gt;CD2&gt;Gal4 UAS-GFP / +</i>                                                        | 4              | 46-50      | 100-104    | 12                       |
| 2 B    | <i>yw hsflp/(y)w; FRT<sup>f00878</sup> ap<sup>DG8</sup> ubi-GFP / FRT<sup>f00878</sup></i>                             | 4              | 42-46      | 86-90      | 30                       |
| 2C     | <i>yw hsflp/(y)w; FRT<sup>f00878</sup> ap<sup>DG8</sup> ubi-GFP / FRT<sup>f00878</sup></i>                             | 4              | 42-46      | 66-70      | 30                       |
| 2D     | <i>yw hsflp/(y)w; FRT<sup>f00878</sup> ap<sup>DG8</sup> ubi-GFP / FRT<sup>f00878</sup></i>                             | 4              | 42-46      | 76-80      | 30                       |
| 2E     | <i>yw hsflp/(y)w; FRT<sup>f00878</sup> ap<sup>DG8</sup> ubi-GFP / FRT<sup>f00878</sup></i>                             | 4              | 42-46      | 86-90      | 30                       |
| 2F     | <i>yw hsflp/(y)w; FRT<sup>f00878</sup> ap<sup>DG8</sup> ubi-GFP / FRT<sup>f00878</sup></i>                             | 4              | 42-46      | 96-100     | 30                       |
| 3B     | <i>yw hsflp/(y)w; FRT<sup>f00878</sup> ap<sup>DG8</sup> ubi-GFP / FRT<sup>f00878</sup></i>                             | 4              | 62-66      | 96-100     | 30                       |
| 3C     | <i>yw hsflp/(y)w; FRT<sup>f00878</sup> ap<sup>DG8</sup> ubi-GFP / FRT<sup>f00878</sup></i>                             | 4              | 62-66      | 106-110    | 30                       |
| 4A     | <i>yw hsflp/(y)w; FRT<sup>f00878</sup> ap<sup>DG8</sup> ubi-GFP / FRT<sup>f00878</sup></i>                             | 4              | 42-46      | 86-90      | 30                       |
| 4B     | <i>yw hsflp / w; UAS-Ap / +; act&gt;CD2&gt;Gal4 UAS-GFP / +</i>                                                        | 4              | 42-46      | 86-90      | 12                       |
| 4C     | <i>yw hsflp /yw; FRT<sup>f00878</sup> ap<sup>DG8</sup> / FRT<sup>f00878</sup> tub-Gal80; tub-Gal4 UAS-GFP / +</i>      | 24             | 32-56      | 76-100     | 30                       |
| 4D     | <i>yw hsflp / w; UAS-Ap / +; act&gt;CD2&gt;Gal4 UAS-GFP / +</i>                                                        | 4              | 42-46      | 86-90      | 12                       |
| 4E     | <i>yw hsflp /yw; FRT<sup>f00878</sup> ap<sup>DG8</sup> / FRT<sup>f00878</sup> tub-Gal80; tub-Gal4 UAS-GFP / +</i>      | 8              | 51-59      | 92-100     | 30                       |
| 4F     | <i>yw hsflp/(y)w; FRT<sup>f00878</sup> ap<sup>DG8</sup> ubi-GFP / FRT<sup>f00878</sup></i>                             | 8              | 40-48      | 92-100     | 30                       |
| 5A     | <i>yw hsflp /yw; FRT<sup>f00878</sup> / FRT<sup>f00878</sup> tub-Gal80; tub-Gal4 UAS-GFP/+</i>                         | 24             | 32-56      | 76-100     | 30                       |
| 5B     | <i>yw hsflp /yw; FRT<sup>f00878</sup> / FRT<sup>f00878</sup> tub-Gal80; tub-Gal4 UAS-GFP/ UAS-p35</i>                  | 24             | 32-56      | 76-100     | 30                       |
| 5C     | <i>yw hsflp /yw; FRT<sup>f00878</sup> ap<sup>DG8</sup> / FRT<sup>f00878</sup> tub-Gal80; tub-Gal4 UAS-GFP/+</i>        | 24             | 32-56      | 76-100     | 30                       |
| 5D     | <i>yw hsflp /yw; FRT<sup>f00878</sup> ap<sup>DG8</sup> / FRT<sup>f00878</sup> tub-Gal80; tub-Gal4 UAS-GFP/ UAS-p35</i> | 24             | 32-56      | 76-100     | 30                       |
| 5G     | <i>yw hsflp /yw; FRT<sup>f00878</sup> ap<sup>DG8</sup> / FRT<sup>f00878</sup> tub-Gal80; tub-Gal4 UAS-GFP/ UAS-p35</i> | 24             | 24-48      | 96-120     | 30                       |
| 6A     | <i>yw hsflp / w; UAS-dLMO / IF or CyO; act&gt;CD2&gt;Gal4 UAS-GFP / MKRS</i>                                           | 8              | 60-68      | 106-114    | 13                       |
| 6B     | <i>yw hsflp / hsflp; UAS-dLMO / CyO or IF; act&gt;CD2&gt;Gal4 UAS-GFP / UAS-p35</i>                                    | 8              | 60-68      | 106-114    | 13                       |
| 6C     | <i>yw hsflp / w; UAS-dLMO / UAS-stg-RNAi; act&gt;CD2&gt;Gal4 UAS-GFP / +</i>                                           | 8              | 60-68      | 106-114    | 13                       |
| 6D     | <i>yw hsflp / yw hsflp; UAS-dLMO / UAS-stg-RNAi; act&gt;CD2&gt;Gal4 UAS-GFP / UAS-p35</i>                              | 8              | 60-68      | 106-114    | 13                       |

|       |                                                                                                                                                |    |       |         |    |
|-------|------------------------------------------------------------------------------------------------------------------------------------------------|----|-------|---------|----|
| 6F    | Same as in 6B                                                                                                                                  |    |       |         |    |
| 6G    | Same as in 6D                                                                                                                                  |    |       |         |    |
| S1A   | <i>yw hsflp/(y)w; FRT<sup>f00878</sup> ubi-GFP / FRT<sup>f00878</sup></i>                                                                      | 4  | 42-46 | 66-70   | 30 |
| S1B   | <i>yw hsflp/(y)w; FRT<sup>f00878</sup> ubi-GFP / FRT<sup>f00878</sup></i>                                                                      | 4  | 42-46 | 76-80   | 30 |
| S1C   | <i>yw hsflp/(y)w; FRT<sup>f00878</sup> ubi-GFP / FRT<sup>f00878</sup></i>                                                                      | 4  | 42-46 | 86-90   | 30 |
| S2A   | <i>yw hsflp / (y)w; FRT<sup>f00878</sup> / FRT<sup>f00878</sup> tub-Gal80; tub-Gal4 UAS-GFP / +</i>                                            | 20 | 46-66 | -       | 30 |
| S2B-G | <i>yw hsflp / (y)w; FRT<sup>f00878</sup> ap<sup>DG8</sup> / FRT<sup>f00878</sup> tub-Gal80; tub-Gal4 UAS-GFP / +</i>                           | 20 | 46-66 | -       | 30 |
| S3A   | <i>(w) hsflp / (y)w (hsflp); FRT<sup>f00878</sup> ap<sup>DG8</sup> ubi-GFP / FRT<sup>f00878</sup> tub-Gal80; tub-Gal4 UAS-mCherry/ UAS-p35</i> | 4  | 42-46 | 76-80   | 30 |
| S3B   | <i>(w) hsflp / (y)w (hsflp); FRT<sup>f00878</sup> ap<sup>DG8</sup> ubi-GFP / FRT<sup>f00878</sup> tub-Gal80; tub-Gal4 UAS-mCherry/ UAS-p35</i> | 4  | 42-46 | 86-90   | 30 |
| S3C   | <i>(w) hsflp / (y)w (hsflp); FRT<sup>f00878</sup> ap<sup>DG8</sup> ubi-GFP / FRT<sup>f00878</sup> tub-Gal80; tub-Gal4 UAS-mCherry/ UAS-p35</i> | 4  | 42-46 | 96-100  | 30 |
| S4A   | <i>yw hsflp / w; IF or CyO / +; act&gt;CD2&gt;Gal4 UAS-GFP / MKRS</i>                                                                          | 8  | 60-68 | 106-114 | 13 |
| S4B   | <i>yw hsflp / hsflp; IF or CyO / +; act&gt;CD2&gt;Gal4 UAS-GFP / UAS-p35</i>                                                                   | 8  | 60-68 | 106-114 | 13 |
| S4C   | <i>yw hsflp / w; UAS-stgRNAi / +; act&gt;CD2&gt;Gal4 UAS-GFP / +</i>                                                                           | 8  | 60-68 | 106-114 | 13 |
| S4D   | <i>yw hsflp / yw hsflp; UAS-stgRNAi / +; act&gt;CD2&gt;Gal4 UAS-GFP / UAS-p35</i>                                                              | 8  | 60-68 | 106-114 | 13 |
| S4E   | Same as in 6A                                                                                                                                  |    |       |         |    |
| S4F   | Same as in 6B                                                                                                                                  |    |       |         |    |
| S4G   | Same as in 6C                                                                                                                                  |    |       |         |    |
| S4H   | Same as in 6D                                                                                                                                  |    |       |         |    |
| S5    | <i>yw hsflp /yw; FRT<sup>f00878</sup> ap<sup>DG8</sup> / FRT<sup>f00878</sup> tub-Gal80; tub-Gal4 UAS-GFP / +</i>                              | 6  | 61-67 | 108-114 | 30 |
